# Supplementary material for: Bacteria-assisted biogreen synthesis of radical scavenging exopolysaccharide–iron complexes: an oral nano-sized nutritional supplement with high in vivo compatibility
Source: Royal Society of Chemistry journal article supplement (doi:10.1039/c9tb01077g), 2019-01-01
Supplement: c9tb01077g1.pdf [file c9tb01077g1.pdf]

## Supplementary Information

### **Bacteria-assisted biogreen synthesis of radical scavenging exopolysaccharide–iron complexes: an oral nano-sized nutritional supplement with high in vivo compatibility**

Seyyed Vahid Niknezhad,<sup>a,b</sup> Ghasem Najafpour Darzi,<sup>a</sup> Sedigheh Kianpour,<sup>b</sup>  
Sina Jafarzadeh,<sup>c</sup> Hamidreza Mohammadi,<sup>b</sup> Younes Ghasemi,<sup>b,d</sup> Reza Heidari,<sup>\*b</sup> and  
Mohammad-Ali Shahbazi<sup>\*e,f</sup>

<sup>a</sup> Department of Chemical Engineering, Faculty of Engineering, Noshirvani University of  
Technology, Babol, Iran

<sup>b</sup> Pharmaceutical Sciences Research Centre, Shiraz University of Medical Sciences, P.O. Box  
71345-1583, Shiraz, Iran

<sup>c</sup> Department of Chemical and Petroleum Engineering, Sharif University of Technology, P.O.  
Box 11365-11155, Tehran, Iran

<sup>d</sup> Department of Pharmaceutical Biotechnology, School of Pharmacy, Shiraz University of  
Medical Sciences, P.O. Box 71345-1583, Shiraz, Iran

<sup>e</sup> Drug Research Program, Division of Pharmaceutical Chemistry and Technology, Faculty of  
Pharmacy, University of Helsinki, Helsinki FI-00014, Finland

<sup>f</sup> Department of Pharmaceutical Nanotechnology, School of Pharmacy, Zanzan University of  
Medical Sciences, 45139-56184, Zanzan, Iran

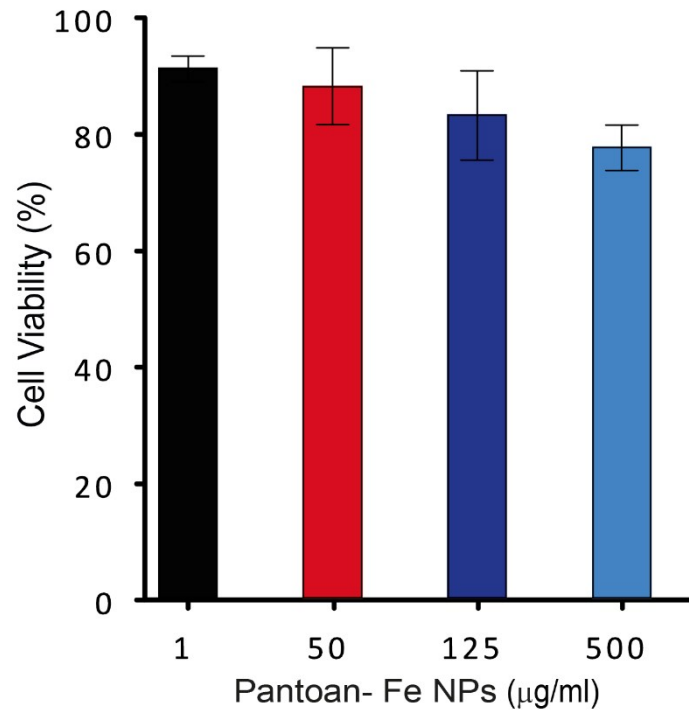

Supplementary Fig. 1. Cytotoxicity assay of Pantoan-Fe complex on **MCF-7 breast cancer cell line cells** at various concentrations. Cells were treated with Pantoan-Fe for 24 h (n=3) at 37 °C.
